# Supplementary material for: Comprehensive CircRNA Profiling and Selection of Key CircRNAs Reveal the Potential Regulatory Roles of CircRNAs throughout Ovarian Development and Maturation in Cynoglossus semilaevis
Source: MDPI journal article supplement (doi:10.3390/biology10090830), 2021-08-26
Supplement: s1 [file s1]

a

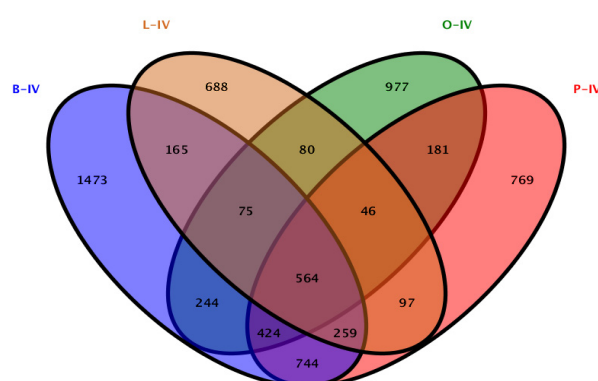

b

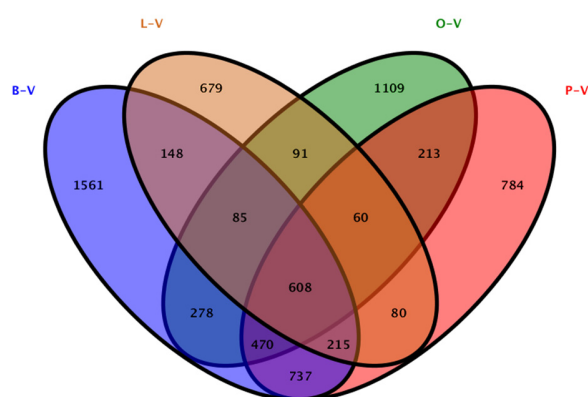

c

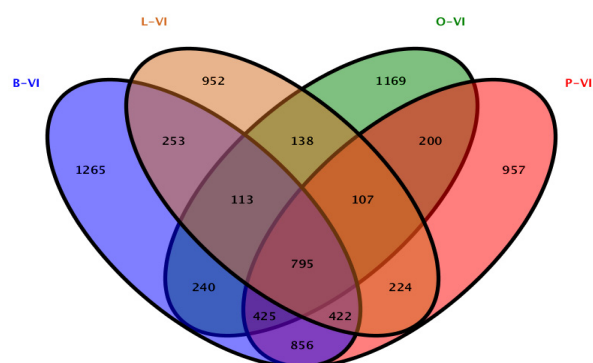

**Figure S1.** Distribution of circRNAs in tongue sole at different ovarian stages. B: brain, P: pituitary, L: liver, O: ovary. **(a)** Distribution of circRNAs in tongue sole at ovarian stage IV. **(b)** Distribution of circRNAs in tongue sole at ovarian stage V. **(c)** Distribution of circRNAs in tongue sole at ovarian stage VI.

a

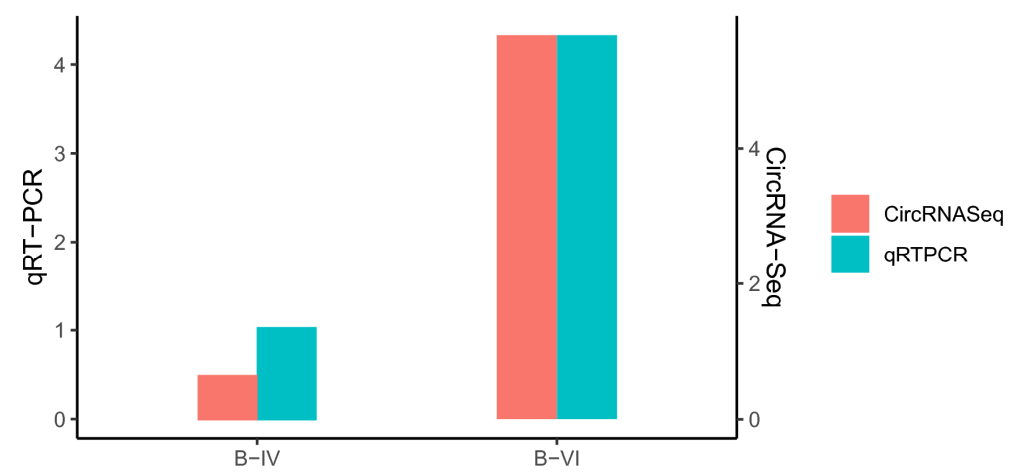

b

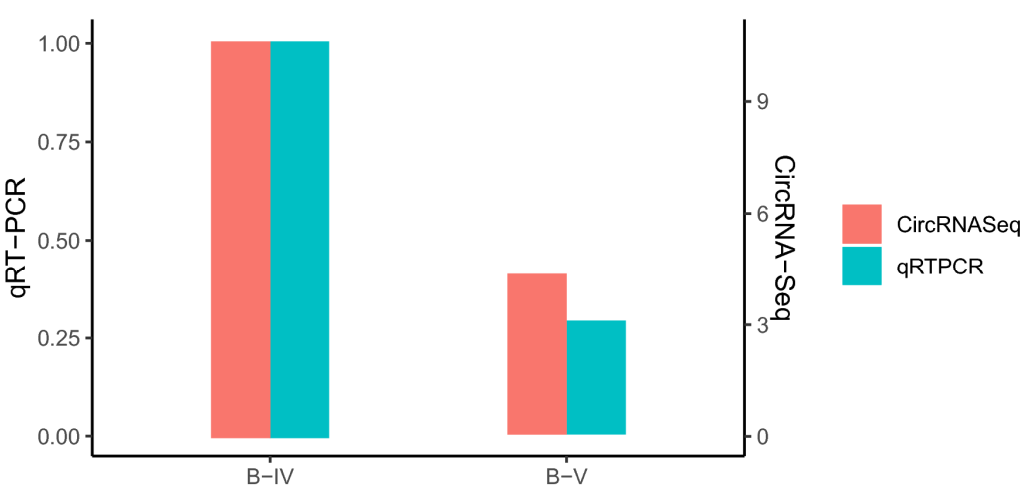

c

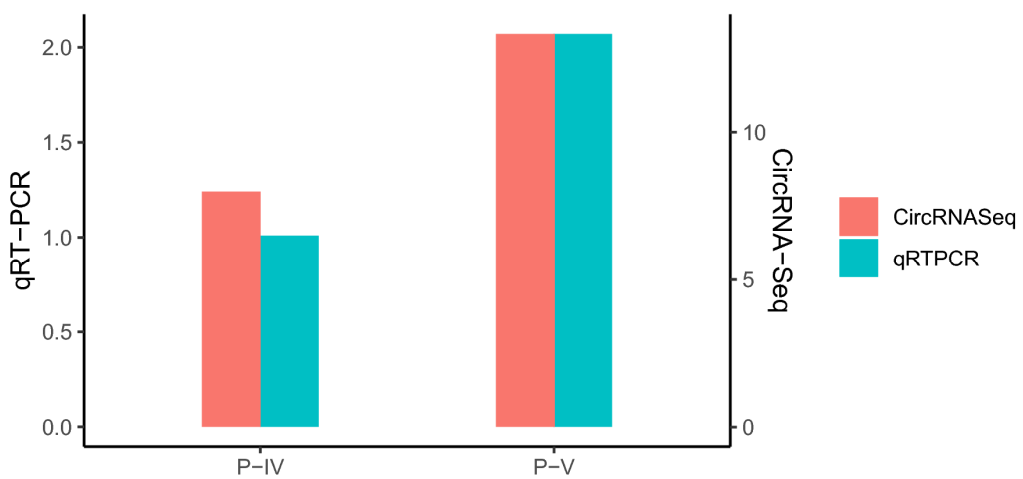

d

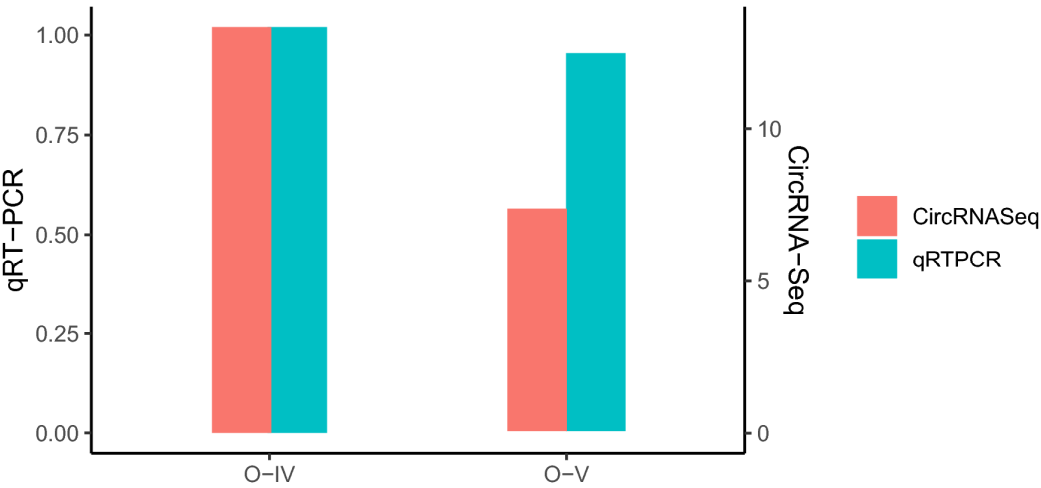

e

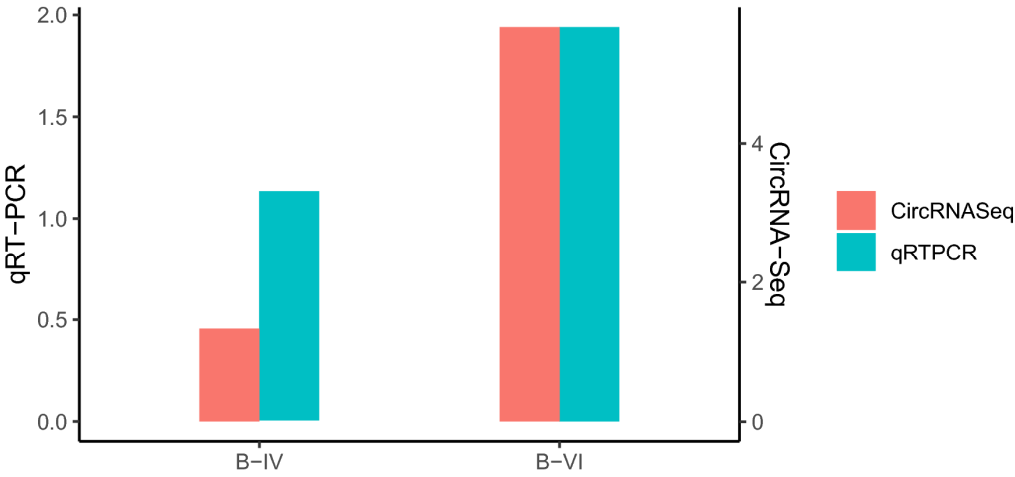

f

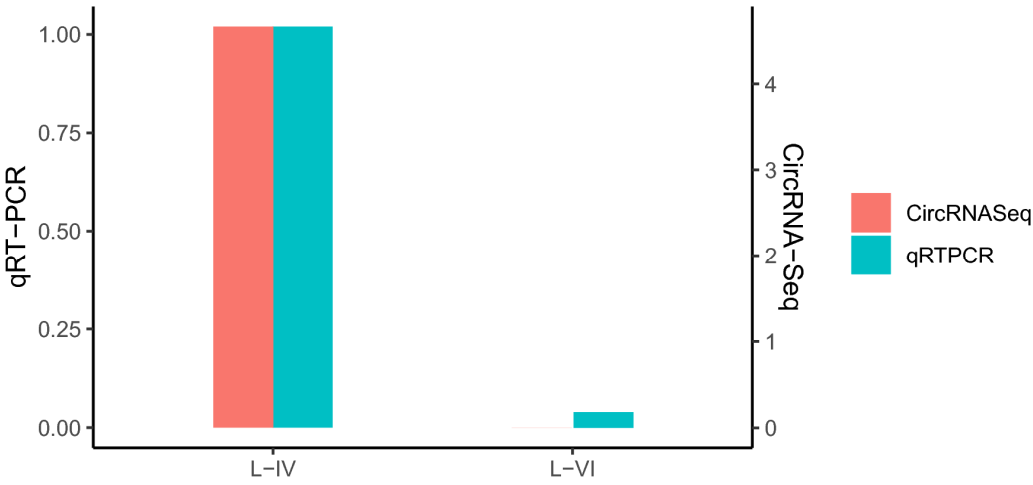

g

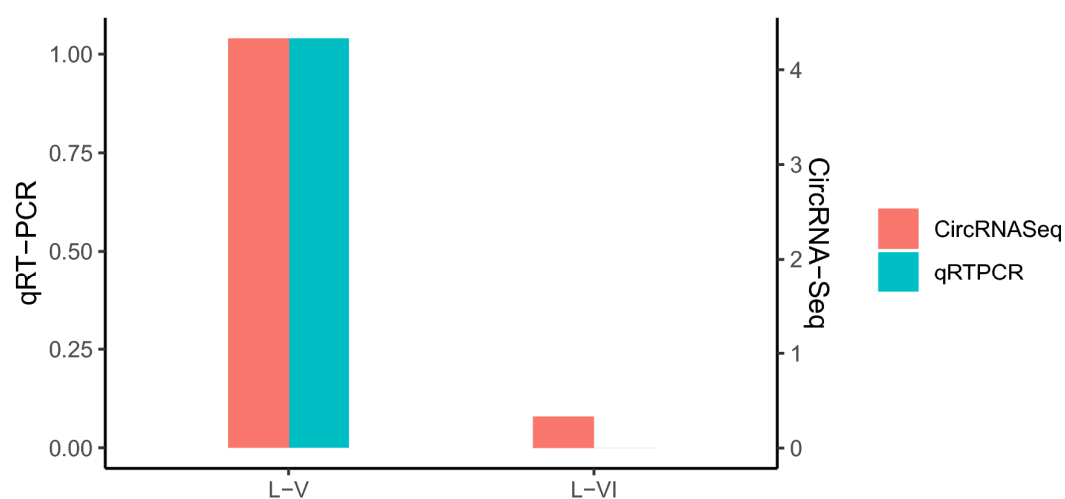

**Figure S2.** Comparison between qRT-PCR validation results and RNA-Seq data (**a**: *circ-ADCY6*, **b**: *circ-TGFBR2*, **c**: *circ-CYP21A2*, **d**: *circ-CYP21A2*, **e**: *circ-CPT1A*, **f**: *circ-ESR1*, **g**: *circ-VTG2*). B: brain, P: pituitary, L: liver, O: ovary.

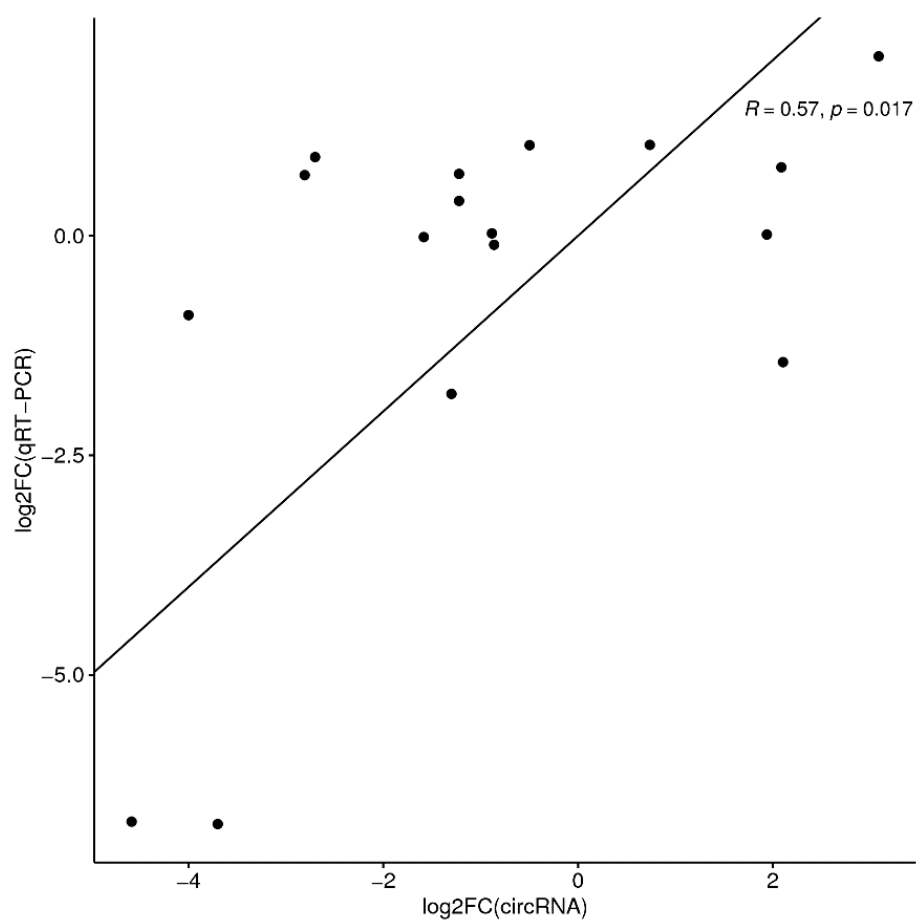

**Figure S3.** Coefficient analysis of fold-change data from qRT-PCR and RNA-seq. Six cirRNAs were selected for qRT-PCR. Scatterplots were generated from the expression ratios obtained from RNA-seq (X-axis) and qRT-PCR (Y-axis).

**Table S1.** Nucleotide sequences of primers used for PCR amplification of circRNAs.

| CircRNA        | ID | Convergent primers (5' - 3') | Divergent primers (5' - 3')       |
|----------------|----|------------------------------|-----------------------------------|
| <i>ADCY6</i>   |    | F: GAATACAAGTGGGCTTTGGAGGC   | F: CACTGCTGCCGGTCAGAATG           |
|                |    | R: TGCCAGGCGGTGACGATGT       | R: GCCTCCAAAGCCCACCTTGTATT        |
| <i>ESR1</i>    |    | F: CCTGGTTAGAGGTGCTGATGATTGG | F: ATCTCATACTGGACAGGAATGAAGGCAACT |
|                |    | R: TGC GGAAGCGGGAAGTGGTG     | R: AACCTGGTTCGTGCAGGGACAGC        |
| <i>TGFBR2</i>  |    | F: CGTAGAACTCGCCTCGTGC       | F: CTGGAGAAAGAACGAGACCG           |
|                |    | R: GTGGCTTGGAAGGGTTATGG      | R: TGGAAAGCAGCGAGGTG              |
| <i>β-actin</i> |    | F: GGTCTGTGATGCCCTTAGATGTC   |                                   |
|                |    | R: AGTGGGGTTCAGCGGGTTAC      |                                   |

**Table S2.** qRT-PCR primers of circRNAs.

| <b>CircRNA</b>      | <b>ID</b> | <b>Primer sequence (5' - 3')</b> |
|---------------------|-----------|----------------------------------|
| <i>Circ-CPT1A</i>   | -F        | AATGGGAAGAACGGCATCAAC            |
| <i>Circ-CPT1A</i>   | -R        | TGGAAACAGTCAGTGGCTAAAGTG         |
| <i>Circ-CYP21A2</i> | -F        | CGCACACACACATCTTCACACTAA         |
| <i>Circ-CYP21A2</i> | -R        | CAGACCCATGGACAGGTGTAG            |
| <i>Circ-ADCY6</i>   | -F        | TCAGAATGAGAGCAGCCGTC             |
| <i>Circ-ADCY6</i>   | -R        | GAGTAGGCGCTCCTGTTTCA             |
| <i>Circ-TGFBR2</i>  | -F        | CGAGCGCATCTCCACGTTAG             |
| <i>Circ-TGFBR2</i>  | -R        | CGATCTCGCTCCTTCTCAGG             |
| <i>Circ968-Vtg2</i> | -F        | AGCTCATGGATAGGCTGACG             |
| <i>Circ968-Vtg2</i> | -R        | AATCACGCTTGCCCTGCTAA             |
| <i>Circ-PLD1</i>    | -F        | TTTCTTGCTGCGGTATTGGC             |
| <i>Circ-PLD1</i>    | -R        | GGCCCATGGAGCACTGAATTA            |
| $\beta$ -actin      | -F        | GCACGGTATTGTGACCAACTGG           |
| $\beta$ -actin      | -R        | CAGGGGAGCCTCTGTGAGC              |

**Table S3.** Summary of circRNA sequencing data. B: brain, P: pituitary, L: liver, O: ovary. IV: ovarian stage IV. V: ovarian stage V. VI: ovarian stage VI.

| Sample | Raw data (bp) | Clean Data (bp) | Q20 (%)              | Q30 (%)              | N (%)          | GC (%)              |
|--------|---------------|-----------------|----------------------|----------------------|----------------|---------------------|
| B-IV-1 | 11687839200   | 11337553205     | 11109658829 (97.99%) | 10628681372 (93.75%) | 278679 (0.00%) | 5588501053 (49.29%) |
| B-IV-2 | 11236317900   | 10902495646     | 10675964629 (97.92%) | 10202547873 (93.58%) | 268101 (0.00%) | 5274077107 (48.37%) |
| B-IV-3 | 11638397700   | 11275184758     | 11036657006 (97.88%) | 10541858631 (93.50%) | 277417 (0.00%) | 5494620501 (48.73%) |
| P-IV-1 | 11397208800   | 11022688918     | 10808912012 (98.06%) | 10355005195 (93.94%) | 270017 (0.00%) | 5665761799 (51.40%) |
| P-IV-2 | 12329510100   | 11969867228     | 11728538841 (97.98%) | 11224311049 (93.77%) | 293260 (0.00%) | 6140764477 (51.30%) |
| P-IV-3 | 11907719100   | 11539952887     | 11308559354 (97.99%) | 10823272494 (93.79%) | 283761 (0.00%) | 5892539015 (51.06%) |
| O-IV-1 | 11885582700   | 11515382363     | 11281304136 (97.97%) | 10793119170 (93.73%) | 282761 (0.00%) | 5971480899 (51.86%) |
| O-IV-2 | 11189614800   | 10825566692     | 10599988549 (97.92%) | 10135878788 (93.63%) | 265323 (0.00%) | 5687014591 (52.53%) |
| O-IV-3 | 11430917700   | 11096828311     | 10882905774 (98.07%) | 10431456999 (94.00%) | 273359 (0.00%) | 5703261966 (51.40%) |
| L-IV-1 | 11391219600   | 11103662320     | 10902759215 (98.19%) | 10469149417 (94.29%) | 274099 (0.00%) | 5765561884 (51.92%) |
| L-IV-2 | 12230671200   | 11911593806     | 11665137836 (97.93%) | 11134965260 (93.48%) | 129459 (0.00%) | 6345678562 (53.27%) |
| L-IV-3 | 12567467100   | 12271323131     | 12058578220 (98.27%) | 11597988436 (94.51%) | 302472 (0.00%) | 6755260689 (55.05%) |
| B-V-1  | 14049978600   | 13653968437     | 13350284065 (97.78%) | 12705001688 (93.05%) | 149247 (0.00%) | 6581841019 (48.20%) |
| B-V-2  | 13437271500   | 13064378709     | 12779086938 (97.82%) | 12168811148 (93.14%) | 141537 (0.00%) | 6316558324 (48.35%) |
| B-V-3  | 14180755800   | 13776876754     | 13470286463 (97.77%) | 12818547160 (93.04%) | 148764 (0.00%) | 6636189602 (48.17%) |
| P-V-1  | 11707022400   | 11327399444     | 11063823525 (97.67%) | 10514173415 (92.82%) | 88096 (0.00%)  | 5687787051 (50.21%) |
| P-V-2  | 11559978900   | 11212961657     | 10991295060 (98.02%) | 10522506448 (93.84%) | 276973 (0.00%) | 5564522422 (49.63%) |
| P-V-3  | 11770452900   | 11378998281     | 11094979655 (97.50%) | 10514485971 (92.40%) | 136851 (0.00%) | 5657951012 (49.72%) |
| O-V-1  | 12581521200   | 12211619999     | 11932884351 (97.72%) | 11345312689 (92.91%) | 143361 (0.00%) | 6097317736 (49.93%) |
| O-V-2  | 13292656200   | 12904213930     | 12642801889 (97.97%) | 12095121425 (93.73%) | 316478 (0.00%) | 6597144733 (51.12%) |
| O-V-3  | 12085141200   | 11799150178     | 11628204296 (98.55%) | 11234260559 (95.21%) | 44068 (0.00%)  | 6101259977 (51.71%) |
| L-V-1  | 12392845200   | 12167082991     | 12045626552 (99.00%) | 11734985218 (96.45%) | 108176 (0.00%) | 6663959206 (54.77%) |
| L-V-2  | 14059226700   | 13688367914     | 13393830409 (97.85%) | 12766500339 (93.27%) | 148020 (0.00%) | 7264764337          |



|        |             |             |                      |                      |                |            |          |
|--------|-------------|-------------|----------------------|----------------------|----------------|------------|----------|
|        |             |             |                      |                      |                |            | (53.07%) |
| L-V-3  | 13846496400 | 13524127596 | 13261647208 (98.06%) | 12680534663 (93.76%) | 146561 (0.00%) | 7128503699 | (52.71%) |
| B-VI-1 | 11164143000 | 10845080636 | 10627923167 (98.00%) | 10169206543 (93.77%) | 267098 (0.00%) | 5220039588 | (48.13%) |
| B-VI-2 | 10992373500 | 10679564530 | 10462555894 (97.97%) | 10003837123 (93.67%) | 262295 (0.00%) | 5052499278 | (47.31%) |
| B-VI-3 | 11802252900 | 11426129969 | 11162414319 (97.69%) | 10607414013 (92.83%) | 135280 (0.00%) | 5505954447 | (48.19%) |
| P-VI-1 | 11680254600 | 11319933392 | 11055864953 (97.67%) | 10507065745 (92.82%) | 123369 (0.00%) | 5566275021 | (49.17%) |
| P-VI-2 | 13062954000 | 12683640819 | 12405877580 (97.81%) | 11835124401 (93.31%) | 310898 (0.00%) | 6308874840 | (49.74%) |
| P-VI-3 | 12595436400 | 12243753475 | 11994573762 (97.96%) | 11470926925 (93.69%) | 301195 (0.00%) | 6144015448 | (50.18%) |
| O-VI-1 | 12142121700 | 11658952372 | 11284277118 (96.79%) | 10598088261 (90.90%) | 126387 (0.00%) | 5680944490 | (48.73%) |
| O-VI-2 | 12281954400 | 11907393064 | 11632547204 (97.69%) | 11053657571 (92.83%) | 149681 (0.00%) | 5902073601 | (49.57%) |
| O-VI-3 | 12730120800 | 12343537306 | 12070704664 (97.79%) | 11492288166 (93.10%) | 134352 (0.00%) | 6102729718 | (49.44%) |
| L-VI-1 | 13445492700 | 13069939112 | 12785172279 (97.82%) | 12182140951 (93.21%) | 140462 (0.00%) | 6987059285 | (53.46%) |
| L-VI-2 | 13826369100 | 13448497075 | 13148072489 (97.77%) | 12514984499 (93.06%) | 145382 (0.00%) | 7032050682 | (52.29%) |
| L-VI-3 | 13581389700 | 13257672890 | 12983766650 (97.93%) | 12386943624 (93.43%) | 143709 (0.00%) | 6797473707 | (51.27%) |
